# Supplementary material for: Dynamic baselines for the detection of water quality impacts – the case of shale gas development
Source: Royal Society of Chemistry journal article supplement (doi:10.1039/d0em00440e), 2021-01-01
Supplement: d0em00440e1.pdf [file d0em00440e1.pdf]

Table S1. Details of the separate aquifer types (Geological formation) used in this study.

| Aquifer type                             | Aquifer class | No. of samples | Specific conductance ( $\mu\text{S}/\text{cm}$ ) |                  |
|------------------------------------------|---------------|----------------|--------------------------------------------------|------------------|
|                                          |               |                | Median                                           | IQR              |
| Bowland High and Craven group            | 2B            | 21             | 625                                              | 581 – 660        |
| Corallian Group                          | 2B            | 17             | 693                                              | 673 - 723        |
| Dinantian Rocsk (undiff.)                | 2B            | 37             | 578                                              | 382 – 624        |
| Fell sandstone group                     | 1B            | 34             | 801                                              | 597 – 930        |
| Gault clay formation                     | 3             | 24             | 946                                              | 564 – 1155       |
| Great oolite                             | 2B            | 237            | 759                                              | 658 – 807        |
| Grey chalk                               | 2A            | 402            | 756                                              | 689 – 808        |
| Inferior oolite                          | 2A            | 218            | 905                                              | 839 – 958        |
| Inverclyde group                         | 2B            | 11             | 556                                              | 464 – 1555       |
| Kellaways & Oxford clay                  | 3             | 179            | 886                                              | 796 – 1260       |
| Lambeth group                            | 1C            | 42             | 906                                              | 644 – 1428       |
| Lias clay                                | 3             | 27             | 262                                              | 223 – 820        |
| Lower Greensand                          | 1A            | 14             | 807                                              | 789 - 825        |
| Millstone grit                           | 2B            | 74             | 425                                              | 290 – 701        |
| Neogene & Quaternary rocks               | 1B            | 93             | 888                                              | 676 – 1110       |
| Pennine coal measures                    | 2B            | 59             | 1080                                             | 695 – 1845       |
| Permian rocks (undiff.)                  | 1A            | 57             | 548                                              | 448 – 612        |
|                                          | 1B            | 7              | 1610                                             | 672 – 1762       |
|                                          | 3             | 29             | 901                                              | 855 – 1040       |
| Pridoli rocks                            | 2C            | 18             | 735                                              | 647 – 909        |
| Thames group                             | 3             | 114            | 918                                              | 708 – 1193       |
| Triassic rocks (udif.)                   | 1A            | 288            | 941                                              | 608 – 1163       |
|                                          | 2B            | 97             | 989                                              | 891 – 1076       |
|                                          | 2C            | 141            | 403                                              | 209 – 629        |
| Upper Devonian rocks                     | 2C            | 5              | 2270                                             | 2170 – 2600      |
| Upper Greensand                          | 1B            | 5              | 70                                               | 70 – 89          |
| Wealden group                            | 3             | 17             | 903                                              | 386 – 1524       |
|                                          | 1B            | 37             | 625                                              | 501 - 816        |
| West Walton, Ampthill & Kimmeridge clays | 3             | 13             | 1140                                             | 784 – 2290       |
| Yoredale group                           | 2B            | 14             | 309                                              | 249 - 360        |
| Zechstein group                          | 2A            | 177            | 845                                              | 650 - 1010       |
| <b>Total</b>                             |               | <b>3315</b>    | <b>767</b>                                       | <b>618 - 938</b> |
